# Supplementary material
Source: publisher figshare collection journal article supplement (https://frontiersin.figshare.com/ndownloader/files/26758688)

## Supplementary hart 2

### Clinical Manifestations of Central Nervous System

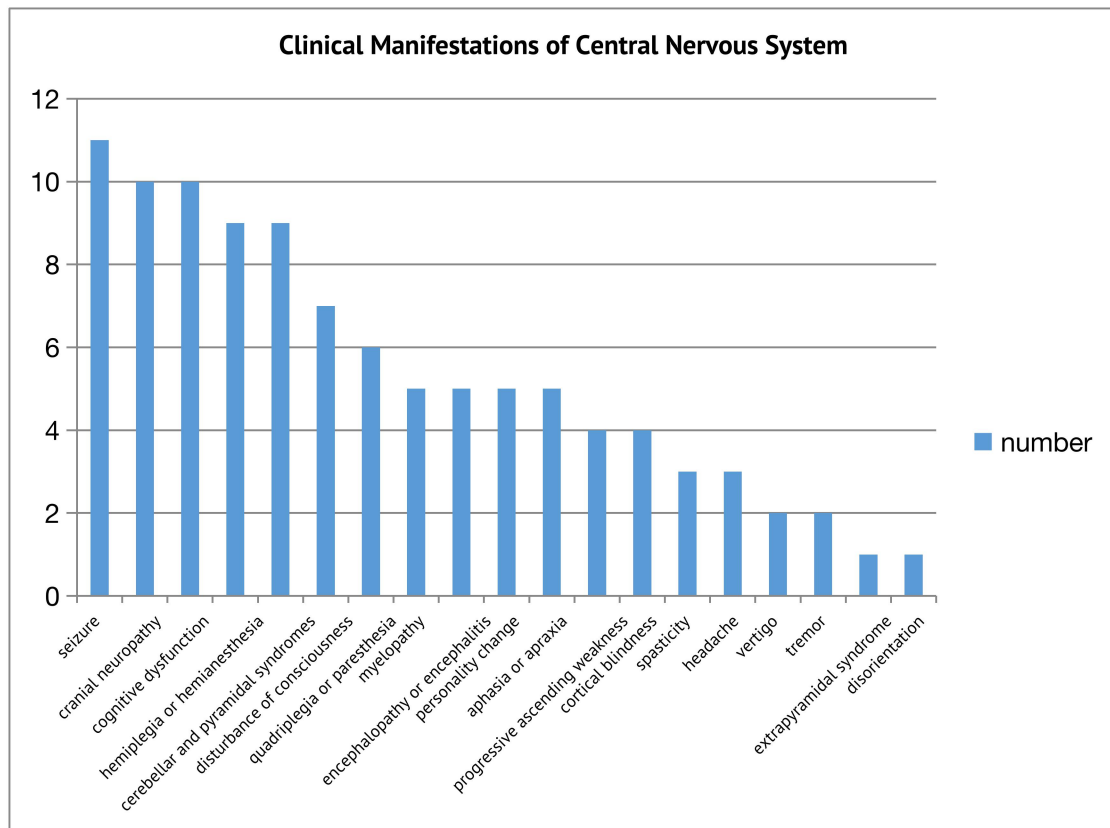

Supplement: Supplementary file [file 26758688]
